# Supplementary material for: Identification of Survival and Therapeutic Response-Related Ferroptosis Regulators in Bladder Cancer through Data Mining and Experimental Validation
Source: MDPI journal article supplement (doi:10.3390/cancers13236069), 2021-12-02
Supplement: s1 [file s1]

**Table S1.** The list of ferroptosis regulators used in this study.

| <b>Symbol</b> | <b>Confidence</b> | <b>Type</b> |
|---------------|-------------------|-------------|
| ACSL3         | Validated         | suppressor  |
| AIFM2         | Validated         | suppressor  |
| AKR1C1        | Validated         | suppressor  |
| AKR1C2        | Validated         | suppressor  |
| AKR1C3        | Validated         | suppressor  |
| ARNTL         | Validated         | suppressor  |
| ATF4          | Validated         | suppressor  |
| BRD4          | Validated         | suppressor  |
| CA9           | Validated         | suppressor  |
| CAV1          | Validated         | suppressor  |
| CBS           | Validated         | suppressor  |
| CD44          | Validated         | suppressor  |
| CDKN1A        | Validated         | suppressor  |
| CHMP5         | Validated         | suppressor  |
| CHMP6         | Validated         | suppressor  |
| CISD1         | Validated         | suppressor  |
| CISD2         | Validated         | suppressor  |
| FADS2         | Validated         | suppressor  |
| FH            | Validated         | suppressor  |
| GCH1          | Validated         | suppressor  |
| GPX4          | Validated         | suppressor  |
| HELLS         | Validated         | suppressor  |
| HIF1A         | Validated         | suppressor  |
| HSF1          | Validated         | suppressor  |
| HSPA5         | Validated         | suppressor  |
| HSPB1         | Validated         | suppressor  |
| ISCU          | Validated         | suppressor  |
| LAMP2         | Validated         | suppressor  |
| MT1G          | Validated         | suppressor  |
| MUC1          | Validated         | suppressor  |
| NF2           | Validated         | suppressor  |
| NFE2L2        | Validated         | suppressor  |
| NFS1          | Validated         | suppressor  |
| NQO1          | Validated         | suppressor  |
| OTUB1         | Validated         | suppressor  |
| PML           | Validated         | suppressor  |
| PRDX6         | Validated         | suppressor  |
| PROM2         | Validated         | suppressor  |
| RB1           | Validated         | suppressor  |
| SCD           | Validated         | suppressor  |
| SESN2         | Validated         | suppressor  |
| SLC40A1       | Validated         | suppressor  |
| SLC7A11       | Validated         | suppressor  |
| SQSTM1        | Validated         | suppressor  |
| SRC           | Validated         | suppressor  |
| STAT3         | Validated         | suppressor  |
| TMBIM4        | Validated         | suppressor  |
| TP63          | Validated         | suppressor  |
| ZFP36         | Validated         | suppressor  |
| CHAC1         | Validated         | marker      |
| FTH1          | Validated         | marker      |
| PTGS2         | Validated         | marker      |
| ABCC1         | Validated         | driver      |
| ACSF2         | Validated         | driver      |
| ACSL4         | Validated         | driver      |
| ACVR1B        | Validated         | driver      |
| ALOX12        | Validated         | driver      |

---

|         |           |        |
|---------|-----------|--------|
| ALOX12B | Validated | driver |
| ALOX15  | Validated | driver |
| ALOX15B | Validated | driver |
| ALOX5   | Validated | driver |
| ALOXE3  | Validated | driver |
| ANO6    | Validated | driver |
| ATF3    | Validated | driver |
| ATG5    | Validated | driver |
| ATG7    | Validated | driver |
| ATM     | Validated | driver |
| ATP5G3  | Validated | driver |
| BAP1    | Validated | driver |
| BECN1   | Validated | driver |
| CARS    | Validated | driver |
| CDKN2A  | Validated | driver |
| CDO1    | Validated | driver |
| CS      | Validated | driver |
| DPP4    | Validated | driver |
| EGFR    | Validated | driver |
| EGLN2   | Validated | driver |
| ELAVL1  | Validated | driver |
| EMC2    | Validated | driver |
| G6PD    | Validated | driver |
| GOT1    | Validated | driver |
| HMGB1   | Validated | driver |
| HMOX1   | Validated | driver |
| IDH1    | Validated | driver |
| IFNG    | Validated | driver |
| IREB2   | Validated | driver |
| KEAP1   | Validated | driver |
| LONP1   | Validated | driver |
| MAPK1   | Validated | driver |
| MAPK3   | Validated | driver |
| MIOX    | Validated | driver |
| MTDH    | Validated | driver |
| MYB     | Validated | driver |
| NCOA4   | Validated | driver |
| NOX4    | Validated | driver |
| PANX1   | Validated | driver |
| PEBP1   | Validated | driver |
| PGD     | Validated | driver |
| PHKG2   | Validated | driver |
| PRKAA1  | Validated | driver |
| PRKAA2  | Validated | driver |
| RPL8    | Validated | driver |
| SAT1    | Validated | driver |
| SLC1A5  | Validated | driver |
| SOCS1   | Validated | driver |
| TAZ     | Validated | driver |
| TF      | Validated | driver |
| TGFBR1  | Validated | driver |
| TNFAIP3 | Validated | driver |
| TP53    | Validated | driver |
| VDAC2   | Validated | driver |
| YY1AP1  | Validated | driver |
| ZEB1    | Validated | driver |

---

**Table S2.** The immune cell signature used in this work for estimating the relative abundance of immune cell infiltration.

| CellType    | Gene Symbol |
|-------------|-------------|
| aDC         | LAMP3       |
| aDC         | CCL1        |
| aDC         | IDO1        |
| aDC         | OAS3        |
| aDC         | EBI3        |
| B cells     | GLDC        |
| B cells     | COCH        |
| B cells     | SLC15A2     |
| B cells     | CR2         |
| B cells     | HLA-DOB     |
| B cells     | SPIB        |
| B cells     | PNOC        |
| B cells     | BLK         |
| B cells     | CD19        |
| B cells     | KIAA0125    |
| B cells     | TNFRSF17    |
| B cells     | GNG7        |
| B cells     | CCR9        |
| B cells     | BLNK        |
| B cells     | ABCB4       |
| B cells     | MEF2C       |
| B cells     | MEF2C       |
| B cells     | IGHM        |
| B cells     | TCL1A       |
| B cells     | BCL11A      |
| B cells     | MS4A1       |
| B cells     | SCN3A       |
| B cells     | MICAL3      |
| B cells     | IGHD        |
| B cells     | IGHA1       |
| B cells     | IGKC        |
| B cells     | DTNB        |
| B cells     | CD72        |
| B cells     | IGLC1       |
| B cells     | MS4A1       |
| B cells     | QRSL1       |
| B cells     | QRSL1       |
| B cells     | OSBPL10     |
| B cells     | BCL11A      |
| B cells     | KIAA0125    |
| B cells     | BACH2       |
| B cells     | FCRL2       |
| B cells     | IGHD        |
| B cells     | TCL1A       |
| CD8 T cells | DNAJB1      |
| CD8 T cells | DNAJB1      |
| CD8 T cells | ZFP36L2     |
| CD8 T cells | ZFP36L2     |
| CD8 T cells | VAMP2       |
| CD8 T cells | PPP1R2      |
| CD8 T cells | TBCC        |
| CD8 T cells | LEPROTL1    |
| CD8 T cells | CAMLG       |
| CD8 T cells | KLF9        |
| CD8 T cells | GADD45A     |
| CD8 T cells | CD8A        |
| CD8 T cells | ZNF91       |
| CD8 T cells | PF4         |

---

|                 |          |
|-----------------|----------|
| CD8 T cells     | THUMPD1  |
| CD8 T cells     | TSC22D3  |
| CD8 T cells     | SLC16A7  |
| CD8 T cells     | GZMM     |
| CD8 T cells     | SIK1     |
| CD8 T cells     | RBM3     |
| CD8 T cells     | APBA2    |
| CD8 T cells     | HAUS3    |
| CD8 T cells     | SF1      |
| CD8 T cells     | FLT3LG   |
| CD8 T cells     | TMEM259  |
| CD8 T cells     | ZNF609   |
| CD8 T cells     | SRSF7    |
| CD8 T cells     | PRF1     |
| CD8 T cells     | TMC6     |
| CD8 T cells     | KAT6A    |
| CD8 T cells     | AES      |
| CD8 T cells     | ZNF22    |
| CD8 T cells     | ABT1     |
| CD8 T cells     | CDKN2AIP |
| CD8 T cells     | PRR5     |
| CD8 T cells     | LIME1    |
| CD8 T cells     | PRR5     |
| CD8 T cells     | C12orf47 |
| Cytotoxic cells | RUNX3    |
| Cytotoxic cells | DUSP2    |
| Cytotoxic cells | GZMA     |
| Cytotoxic cells | GNLY     |
| Cytotoxic cells | ZBTB16   |
| Cytotoxic cells | KLRD1    |
| Cytotoxic cells | KLRD1    |
| Cytotoxic cells | APBA2    |
| Cytotoxic cells | GZMH     |
| Cytotoxic cells | RORA     |
| Cytotoxic cells | KLRD1    |
| Cytotoxic cells | NKG7     |
| Cytotoxic cells | CTSW     |
| Cytotoxic cells | KLRB1    |
| Cytotoxic cells | SIGIRR   |
| Cytotoxic cells | KLRF1    |
| Cytotoxic cells | APOL3    |
| Cytotoxic cells | GNLY     |
| Cytotoxic cells | SIGIRR   |
| DC              | HSD11B1  |
| DC              | CCL13    |
| DC              | CD209    |
| DC              | CCL22    |
| DC              | CCL17    |
| DC              | PPFIBP2  |
| DC              | NPR1     |
| Eosinophils     | THBS1    |
| Eosinophils     | THBS1    |
| Eosinophils     | SIAH1    |
| Eosinophils     | TGIF1    |
| Eosinophils     | HES1     |
| Eosinophils     | HES1     |
| Eosinophils     | KBTBD11  |
| Eosinophils     | THBS4    |
| Eosinophils     | KCNH2    |
| Eosinophils     | ABHD2    |
| Eosinophils     | RNASE2   |
| Eosinophils     | CLC      |

---

---

|             |          |
|-------------|----------|
| Eosinophils | PTGDR2   |
| Eosinophils | EMR1     |
| Eosinophils | CD101    |
| Eosinophils | SYNJ1    |
| Eosinophils | CCR3     |
| Eosinophils | HIST1H1C |
| Eosinophils | KCNH2    |
| Eosinophils | IL5RA    |
| Eosinophils | IL5RA    |
| Eosinophils | GALC     |
| Eosinophils | CAT      |
| Eosinophils | TIPARP   |
| Eosinophils | SYNJ1    |
| Eosinophils | TKTL1    |
| Eosinophils | LRP5L    |
| Eosinophils | RRP12    |
| Eosinophils | TKTL1    |
| Eosinophils | RCOR3    |
| Eosinophils | SMPD3    |
| Eosinophils | CYSLTR2  |
| Eosinophils | HRH4     |
| Eosinophils | ACACB    |
| Eosinophils | C9orf156 |
| Eosinophils | ACACB    |
| Eosinophils | ACACB    |
| Eosinophils | MYO15B   |
| iDC         | BLVRB    |
| iDC         | TACSTD2  |
| iDC         | CSF1R    |
| iDC         | F13A1    |
| iDC         | GSTT1    |
| iDC         | RAP1GAP  |
| iDC         | VASH1    |
| iDC         | FABP4    |
| iDC         | PREP     |
| iDC         | MMP12    |
| iDC         | CTNS     |
| iDC         | SYT17    |
| iDC         | CD1C     |
| iDC         | GUCA1A   |
| iDC         | CLEC10A  |
| iDC         | CD1B     |
| iDC         | CH25H    |
| iDC         | PPARG    |
| iDC         | CD1E     |
| iDC         | ABCG2    |
| iDC         | FZD2     |
| iDC         | CD1A     |
| iDC         | CD1E     |
| iDC         | SLC7A8   |
| iDC         | PDXK     |
| iDC         | NUDT9    |
| iDC         | MS4A6A   |
| iDC         | HS3ST2   |
| iDC         | DCSTAMP  |
| iDC         | LMAN2L   |
| Macrophages | EMP1     |
| Macrophages | SCARB2   |
| Macrophages | RAI14    |
| Macrophages | CTSK     |
| Macrophages | APOE     |
| Macrophages | CD163    |

---

---

|             |         |
|-------------|---------|
| Macrophages | FDX1    |
| Macrophages | SCG5    |
| Macrophages | CYBB    |
| Macrophages | ME1     |
| Macrophages | GPC4    |
| Macrophages | GPC4    |
| Macrophages | KAL1    |
| Macrophages | SULT1C2 |
| Macrophages | MARCO   |
| Macrophages | CCL7    |
| Macrophages | CHIT1   |
| Macrophages | MSR1    |
| Macrophages | CHI3L1  |
| Macrophages | CD84    |
| Macrophages | SULT1C2 |
| Macrophages | PTGDS   |
| Macrophages | MSR1    |
| Macrophages | PTGDS   |
| Macrophages | SGMS1   |
| Macrophages | BCAT1   |
| Macrophages | BCAT1   |
| Macrophages | FN1     |
| Macrophages | MSR1    |
| Macrophages | CXCL5   |
| Macrophages | CD163   |
| Macrophages | GM2A    |
| Macrophages | ATG7    |
| Macrophages | PCOLCE2 |
| Macrophages | MS4A4A  |
| Macrophages | CLEC5A  |
| Macrophages | DNASE2B |
| Macrophages | COLEC12 |
| Macrophages | COL8A2  |
| Mast cells  | ABCC4   |
| Mast cells  | MPO     |
| Mast cells  | SCG2    |
| Mast cells  | MAOB    |
| Mast cells  | VWA5A   |
| Mast cells  | KIT     |
| Mast cells  | PTGS1   |
| Mast cells  | CALB2   |
| Mast cells  | CPA3    |
| Mast cells  | CTSG    |
| Mast cells  | TPSAB1  |
| Mast cells  | SLC18A2 |
| Mast cells  | ADCYAP1 |
| Mast cells  | TAL1    |
| Mast cells  | SIGLEC6 |
| Mast cells  | SIGLEC6 |
| Mast cells  | NR0B1   |
| Mast cells  | CEACAM8 |
| Mast cells  | HPGDS   |
| Mast cells  | ELANE   |
| Mast cells  | HDC     |
| Mast cells  | TPSB2   |
| Mast cells  | MS4A2   |
| Mast cells  | MS4A2   |
| Mast cells  | TPSAB1  |
| Mast cells  | GATA2   |
| Mast cells  | TPSAB1  |
| Mast cells  | VWA5A   |
| Mast cells  | SIGLEC6 |

---

---

|                     |           |
|---------------------|-----------|
| Mast cells          | HPGD      |
| Mast cells          | PRG2      |
| Mast cells          | PPM1H     |
| Mast cells          | CMA1      |
| Mast cells          | LINC01140 |
| Mast cells          | TPSAB1    |
| Mast cells          | MLPH      |
| Mast cells          | SLC24A3   |
| Mast cells          | SLC24A3   |
| Neutrophils         | CD93      |
| Neutrophils         | CD93      |
| Neutrophils         | MME       |
| Neutrophils         | MME       |
| Neutrophils         | CSF3R     |
| Neutrophils         | FCGR3B    |
| Neutrophils         | TECPR2    |
| Neutrophils         | FPR1      |
| Neutrophils         | BST1      |
| Neutrophils         | S100A12   |
| Neutrophils         | SLC22A4   |
| Neutrophils         | TNFRSF10C |
| Neutrophils         | CYP4F3    |
| Neutrophils         | MGAM      |
| Neutrophils         | CXCR2     |
| Neutrophils         | CXCR1     |
| Neutrophils         | FCAR      |
| Neutrophils         | CEACAM3   |
| Neutrophils         | LILRB2    |
| Neutrophils         | FPR2      |
| Neutrophils         | FPR2      |
| Neutrophils         | CEACAM3   |
| Neutrophils         | TNFRSF10C |
| Neutrophils         | FCAR      |
| Neutrophils         | KCNJ15    |
| Neutrophils         | FCAR      |
| Neutrophils         | G0S2      |
| Neutrophils         | ALPL      |
| Neutrophils         | SLC25A37  |
| Neutrophils         | CPPED1    |
| Neutrophils         | DYSF      |
| Neutrophils         | HPSE      |
| Neutrophils         | SIGLEC5   |
| Neutrophils         | VNN3      |
| Neutrophils         | CRISPLD2  |
| NK CD56bright cells | DUSP4     |
| NK CD56bright cells | DUSP4     |
| NK CD56bright cells | PLA2G6    |
| NK CD56bright cells | RRAD      |
| NK CD56bright cells | FOXJ1     |
| NK CD56bright cells | XCL1      |
| NK CD56bright cells | MPPED1    |
| NK CD56bright cells | PLA2G6    |
| NK CD56bright cells | MUC3B     |
| NK CD56bright cells | LPCAT4    |
| NK CD56bright cells | PLA2G6    |
| NK CD56bright cells | TRAPPC9   |
| NK CD56bright cells | MADD      |
| NK CD56dim cells    | GTF3C1    |
| NK CD56dim cells    | KIR2DL3   |
| NK CD56dim cells    | KIR2DS5   |
| NK CD56dim cells    | GZMB      |
| NK CD56dim cells    | KIR3DS1   |

---

---

|                  |         |
|------------------|---------|
| NK CD56dim cells | KIR2DS2 |
| NK CD56dim cells | KIR3DL1 |
| NK CD56dim cells | TTC38   |
| NK CD56dim cells | KIR2DS4 |
| NK CD56dim cells | KIR3DL3 |
| NK CD56dim cells | PMEPA1  |
| NK CD56dim cells | S1PR5   |
| NK CD56dim cells | IL21R   |
| NK cells         | IGFBP5  |
| NK cells         | MAPRE3  |
| NK cells         | ZNF747  |
| NK cells         | XCL1    |
| NK cells         | ZNF205  |
| NK cells         | TCTN2   |
| NK cells         | TRPV6   |
| NK cells         | FGF18   |
| NK cells         | BCL2    |
| NK cells         | TBXA2R  |
| NK cells         | NCR1    |
| NK cells         | CDC5L   |
| NK cells         | MRC2    |
| NK cells         | FZR1    |
| NK cells         | ALDH1B1 |
| NK cells         | ADARB1  |
| NK cells         | PSMD4   |
| NK cells         | FUT5    |
| NK cells         | FZR1    |
| NK cells         | APBB2   |
| NK cells         | PDLIM4  |
| NK cells         | ZNF528  |
| NK cells         | MCM3AP  |
| NK cells         | LDB3    |
| NK cells         | GNAS    |
| NK cells         | NCR1    |
| NK cells         | NCR1    |
| NK cells         | TINAGL1 |
| NK cells         | PRX     |
| NK cells         | SLC30A5 |
| NK cells         | KANK2   |
| pDC              | IL3RA   |
| T cells          | ITM2A   |
| T cells          | LCK     |
| T cells          | LCK     |
| T cells          | CD3E    |
| T cells          | SKAP1   |
| T cells          | CD2     |
| T cells          | CD28    |
| T cells          | CD96    |
| T cells          | CD3G    |
| T cells          | TRAC    |
| T cells          | TRAC    |
| T cells          | PRKCQ   |
| T cells          | PRKCQ   |
| T cells          | SH2D1A  |
| T cells          | TRBC1   |
| T cells          | NCALD   |
| T cells          | TRBC1   |
| T cells          | CD3D    |
| T cells          | YME1L1  |
| T cells          | CD6     |
| T cells          | TRDV3   |
| T cells          | TRAT1   |

---

---

|                |             |
|----------------|-------------|
| T cells        | BCL11B      |
| T helper cells | UBE2L3      |
| T helper cells | ANP32B      |
| T helper cells | NAP1L4      |
| T helper cells | RPA1        |
| T helper cells | SEC24C      |
| T helper cells | ITM2A       |
| T helper cells | SLC25A12    |
| T helper cells | ASF1A       |
| T helper cells | ATF2        |
| T helper cells | BATF        |
| T helper cells | GOLGA8A     |
| T helper cells | ICOS        |
| T helper cells | CD28        |
| T helper cells | FRYL        |
| T helper cells | PPP2R5C     |
| T helper cells | SRSF10      |
| T helper cells | LRBA        |
| T helper cells | FAM111A     |
| T helper cells | NUP107      |
| T helper cells | PHF10       |
| T helper cells | BORA        |
| T helper cells | DDX50       |
| T helper cells | SLC7A6      |
| Tcm            | AQP3        |
| Tcm            | CLUAP1      |
| Tcm            | FYB         |
| Tcm            | USP9Y       |
| Tcm            | TXK         |
| Tcm            | KLF12       |
| Tcm            | CASP8       |
| Tcm            | CEP68       |
| Tcm            | ATM         |
| Tcm            | PCM1        |
| Tcm            | CDC14A      |
| Tcm            | NFATC3      |
| Tcm            | TIMM8A      |
| Tcm            | ATM         |
| Tcm            | HNRNPH1     |
| Tcm            | CREBZF      |
| Tcm            | TXLNGY      |
| Tcm            | CYLD        |
| Tcm            | MAP3K1      |
| Tcm            | DOCK9       |
| Tcm            | N4BP2L2-IT2 |
| Tcm            | PCNX        |
| Tcm            | REPS1       |
| Tcm            | TRAF3IP3    |
| Tcm            | PHC3        |
| Tcm            | NMT2        |
| Tcm            | KMT2A       |
| Tcm            | SPDYE2      |
| Tcm            | STX16       |
| Tcm            | NEFL        |
| Tem            | TBCD        |
| Tem            | TBC1D5      |
| Tem            | NFATC4      |
| Tem            | PRKY        |
| Tem            | CCR2        |
| Tem            | LTK         |
| Tem            | CCR2        |
| Tem            | MEFV        |

---

---

|           |          |
|-----------|----------|
| Tem       | DDX17    |
| Tem       | SND1-IT1 |
| Tem       | FLI1     |
| Tem       | FLI1     |
| Tem       | AKT3     |
| Tem       | EZR      |
| Tem       | TCRA     |
| Tem       | GDPD5    |
| TFH       | STK39    |
| TFH       | PTPN13   |
| TFH       | CHGB     |
| TFH       | TOX      |
| TFH       | CDK5R1   |
| TFH       | CXCL13   |
| TFH       | PVALB    |
| TFH       | CXCR5    |
| TFH       | MAF      |
| TFH       | PDCD1    |
| TFH       | ICA1     |
| TFH       | LDLRAD4  |
| TFH       | MYO7A    |
| TFH       | MAF      |
| TFH       | LDLRAD4  |
| TFH       | TSHR     |
| TFH       | ST8SIA1  |
| TFH       | MYO6     |
| TFH       | ICA1     |
| TFH       | SMAD1    |
| TFH       | CHI3L2   |
| TFH       | PASK     |
| TFH       | HIST1H4J |
| TFH       | CXCR5    |
| TFH       | PASK     |
| TFH       | MKL2     |
| TFH       | POMT1    |
| TFH       | MAGEH1   |
| TFH       | HEY1     |
| TFH       | SH3TC1   |
| TFH       | B3GAT1   |
| TFH       | KCNK5    |
| TFH       | THADA    |
| TFH       | SIRPG    |
| TFH       | SLC7A10  |
| TFH       | KIAA1324 |
| TFH       | MYO7A    |
| TFH       | HEY1     |
| TFH       | THADA    |
| TFH       | ZNF764   |
| Tgd       | FEZ1     |
| Tgd       | C1orf61  |
| Tgd       | CD160    |
| Tgd       | TRDC     |
| Th1 cells | APOD     |
| Th1 cells | BST2     |
| Th1 cells | DPP4     |
| Th1 cells | CCL4     |
| Th1 cells | SGCB     |
| Th1 cells | LRP8     |
| Th1 cells | BTG3     |
| Th1 cells | SYNGR3   |
| Th1 cells | CD38     |
| Th1 cells | CD70     |

---

---

|            |          |
|------------|----------|
| Th1 cells  | DGKI     |
| Th1 cells  | LTA      |
| Th1 cells  | IL12RB2  |
| Th1 cells  | DUSP5    |
| Th1 cells  | LRRN3    |
| Th1 cells  | CSF2     |
| Th1 cells  | IFNG     |
| Th1 cells  | CMAHP    |
| Th1 cells  | DPP4     |
| Th1 cells  | ATP9A    |
| Th1 cells  | APBB2    |
| Th1 cells  | DOK5     |
| Th1 cells  | EGFL6    |
| Th1 cells  | ZBTB32   |
| Th1 cells  | IL22     |
| Th1 cells  | CTLA4    |
| Th1 cells  | HBEGF    |
| Th1 cells  | APBB2    |
| Th17 cells | IL17RA   |
| Th17 cells | RORC     |
| Th17 cells | IL17A    |
| Th17 cells | IL17A    |
| Th2 cells  | DHFR     |
| Th2 cells  | SNRPD1   |
| Th2 cells  | GSTA4    |
| Th2 cells  | SMAD2    |
| Th2 cells  | SMAD2    |
| Th2 cells  | MB       |
| Th2 cells  | CDC7     |
| Th2 cells  | WDHD1    |
| Th2 cells  | CDC25C   |
| Th2 cells  | PMCH     |
| Th2 cells  | CXCR6    |
| Th2 cells  | LAIR2    |
| Th2 cells  | PTGIS    |
| Th2 cells  | ANK1     |
| Th2 cells  | CENPF    |
| Th2 cells  | GATA3    |
| Th2 cells  | EVI5     |
| Th2 cells  | BIRC5    |
| Th2 cells  | PHEX     |
| Th2 cells  | CXCR6    |
| Th2 cells  | SLC39A14 |
| Th2 cells  | MICAL2   |
| Th2 cells  | ADCY1    |
| Th2 cells  | LIMA1    |
| Th2 cells  | NEIL3    |
| Th2 cells  | HELLS    |
| Th2 cells  | AHI1     |
| Th2 cells  | AHI1     |
| Th2 cells  | IL26     |
| Th2 cells  | AHI1     |
| Th2 cells  | DHFR     |
| TReg       | FOXP3    |
| TReg       | FOXP3    |

---

**Table S3.** Primers details of genes involved in signature.

| Gene  | Forward                | Reverse                 |
|-------|------------------------|-------------------------|
| G6PD  | AGAGCTTTTCCAGGGCGATG   | ACGATGAAGGTGTTTTTCGGGC  |
| EGFR  | ATCCCACAGCAGGGCTTCTTCA | AGCAGGACTGTTTCCAGACAAGC |
| CHMP6 | ACAGGACGGAGAACCAGATCA  | CTCCACCTCTTCAATGGACATCA |
| AIM2  | TTCTCTGCACCGGCATCAAGA  | AATGGCGTAGACGTTGCTGTG   |
| VDAC2 | AACTTTGCAGTGGGCTACAGG  | TGCCAAAACGAGTGCAGTTGG   |
| IFNG  | CAGCTCTGCATCGTTTTGGGT  | CCGCTACATCTGAATGACCTGC  |
| PROM2 | TCTCGGTGGTGCAGCTCAAT   | TGTGCTCTGTCTTCACTCGTCC  |

**Table S4.** Parameters of multivariate Cox regression model in TCGA-BLCA cohort.

| id    | coef       | exp(coef)   | se(coef)   | z          | Pr(> z )    |
|-------|------------|-------------|------------|------------|-------------|
| CHMP6 | 0.35358744 | 1.424167507 | 0.13640893 | 2.59211364 | 0.009538826 |
| VDAC2 | 0.35189238 | 1.421755507 | 0.12672778 | 2.7767581  | 0.005490402 |
| G6PD  | 0.21776994 | 1.243301    | 0.07128877 | 3.05475818 | 0.002252421 |
| PROM2 | -0.167244  | 0.845993158 | 0.03871818 | -4.3195218 | 0.000015637 |
| EGFR  | 0.17468025 | 1.190865374 | 0.04817747 | 3.62576645 | 0.000288106 |
| IFNG  | -0.3193266 | 0.726638202 | 0.08028624 | -3.9773515 | 0.000069687 |
| AIFM2 | -0.3695087 | 0.691073755 | 0.10013156 | -3.6902323 | 0.000224049 |
